# Supplementary material for: Orthopoxvirus Circulation in an Endemic Area in Brazil: Investigation of Infections in Small Mammals during an Absence of Outbreaks
Source: MDPI journal article supplement (doi:10.3390/v15040842), 2023-03-25
Supplement: s1 [file s1]

**Table S1.** Primers and probe sequences from OPV genes C11R, A56R and E9L

| Gene Primers and Probe | Sequence                                   | Reference |
|------------------------|--------------------------------------------|-----------|
| C11R Forward           | 5' CGTACAACAGATATTCCAGCTATCAG 3'           | 34        |
| C11R Reverse           | 5' AGCGTGGATACAGTCACCGTGTA 3'              |           |
| A56R Forward           | 5' CATCATCTGGAATTGTCACTACTAAA 3'           | 35        |
| A56R Reverse           | 5' ACGGCCGACAATATAATTAATGC 3'              |           |
| E9L Forward            | 5' TCAACTGAAAAGGCCATCTATGA 3'              | 36        |
| E9L Reverse            | 5' GAGTATAGAGCACTATTCTAAATCCCA 3'          |           |
| E9L-NVAR probe         | 5' TET-CCATGCAATATACGTACAAGATAGTAGCCAAC 3' |           |
