# Supplementary material for: Orthopoxvirus Circulation in an Endemic Area in Brazil: Investigation of Infections in Small Mammals during an Absence of Outbreaks
Source: MDPI journal article supplement (doi:10.3390/v15040842), 2023-03-25
Supplement: s1 [file s1]

Orthopoxvirus circulation in an endemic area in Brazil: Investigation of infections in small mammals during an absence of outbreaks

**Table S2.** Small mammals data from field expeditions

| Order               | Genus/Species                | Number of Captures |          | Samples |          |       |          | Site of capture |          |         |          |              |          | Weather conditions |          |       |          | Farms |          |     |          |     |          |
|---------------------|------------------------------|--------------------|----------|---------|----------|-------|----------|-----------------|----------|---------|----------|--------------|----------|--------------------|----------|-------|----------|-------|----------|-----|----------|-----|----------|
|                     |                              |                    |          | Liver   |          | Serum |          | Forest          |          | Pasture |          | Peridomicile |          | Dry                |          | Rainy |          | A     |          | B   |          | C   |          |
|                     |                              | no.                | (%)      | no.     | (%)      | no.   | (%)      | no.             | (%)      | no.     | (%)      | no.          | (%)      | no.                | (%)      | no.   | (%)      | no.   | (%)      | no. | (%)      | no. | (%)      |
| Didelphimorphia     | <i>Caluromys philander</i>   | 1                  | (0.48)   | 1       | (0.93)   | 1     | (0.70)   | 1               | (0.84)   | -       | -        | -            | -        | 1                  | (0.63)   | -     | -        | 1     | (2.70)   | -   | -        | -   | -        |
|                     | <i>Didelphis albiventris</i> | 29                 | (13.81)  | 1       | (0.93)   | 16    | (11.27)  | 26              | (21.85)  | 3       | (10.71)  | -            | -        | 25                 | (15.72)  | 4     | (7.84)   | -     | -        | 24  | (30.77)  | 5   | (5.26)   |
|                     | <i>Didelphis aurita</i>      | 67                 | (31.90)  | 3       | (2.80)   | 30    | (21.13)  | 40              | (33.61)  | 11      | (39.29)  | 16           | (25.40)  | 58                 | (36.48)  | 9     | (17.65)  | 4     | (10.81)  | 18  | (23.08)  | 45  | (47.37)  |
|                     | <i>Gracilianus sp.</i>       | 2                  | (0.95)   | 2       | (1.87)   | 2     | (1.41)   | 1               | (0.84)   | -       | -        | 1            | (1.59)   | 2                  | (1.26)   | -     | -        | 2     | (5.41)   | -   | -        | -   | -        |
|                     | <i>Marmosops incanus</i>     | 40                 | (19.05)  | 35      | (32.71)  | 36    | (25.35)  | 37              | (31.09)  | -       | -        | 3            | (4.76)   | 28                 | (17.61)  | 12    | (23.53)  | 7     | (18.92)  | 33  | (42.31)  | -   | -        |
|                     | <i>Monodelphis americana</i> | 1                  | (0.48)   | 1       | (0.93)   | -     | -        | 1               | (0.84)   | -       | -        | -            | -        | 1                  | (0.63)   | -     | -        | -     | -        | 1   | (1.28)   | -   | -        |
|                     | <i>Philander frenatus</i>    | 3                  | (1.43)   | 3       | (2.80)   | 3     | (2.11)   | 1               | (0.84)   | -       | -        | 2            | (3.17)   | 2                  | (1.26)   | 1     | (1.96)   | 3     | (8.11)   | -   | -        | -   | -        |
| Total of marsupials |                              | 143                | (68.10)  | 46      | (42.99)  | 88    | (61.97)  | 107             | (89.92)  | 14      | (50.00)  | 22           | (34.92)  | 117                | (73.58)  | 26    | (50.98)  | 17    | (45.95)  | 76  | (97.44)  | 50  | (52.63)  |
| Rodentia            | <i>Akodon sp.</i>            | 1                  | (0.48)   | 1       | (0.93)   | 1     | (0.70)   | 1               | (0.84)   | -       | -        | -            | -        | 1                  | (0.63)   | -     | -        | 1     | (2.70)   | -   | -        | -   | -        |
|                     | <i>Calomys cf tener</i>      | 2                  | (0.95)   | 1       | (0.93)   | -     | -        | -               | -        | 2       | (7.14)   | -            | -        | 2                  | (1.26)   | -     | -        | 1     | (2.70)   | 1   | (1.28)   | -   | -        |
|                     | <i>Calomys cf expulsus</i>   | 3                  | (1.43)   | 3       | (2.80)   | 3     | (2.11)   | -               | -        | 3       | (10.71)  | -            | -        | 3                  | (1.89)   | -     | -        | -     | -        | -   | -        | 3   | (3.16)   |
|                     | <i>Calomys sp.</i>           | 6                  | (2.86)   | 6       | (5.61)   | 6     | (4.23)   | -               | -        | 1       | (3.57)   | 5            | (7.94)   | 1                  | (0.63)   | 5     | (9.80)   | 1     | (2.70)   | -   | -        | 5   | (5.26)   |
|                     | <i>Cerradomys sp.</i>        | 1                  | (0.48)   | 1       | (0.93)   | 1     | (0.70)   | 1               | (0.84)   | -       | -        | -            | -        | 1                  | (0.63)   | -     | -        | 1     | (2.70)   | -   | -        | -   | -        |
|                     | <i>Cerradomys subflavus</i>  | 1                  | (0.48)   | 1       | (0.93)   | 1     | (0.70)   | -               | -        | -       | -        | 1            | (1.59)   | 1                  | (0.63)   | -     | -        | 1     | (2.70)   | -   | -        | -   | -        |
|                     | <i>Mus musculus</i>          | 7                  | (3.33)   | 5       | (4.67)   | 4     | (2.82)   | -               | -        | -       | -        | 7            | (11.11)  | 2                  | (1.26)   | 5     | (9.80)   | -     | -        | -   | -        | 7   | (7.37)   |
|                     | <i>Necomys lasiurus</i>      | 18                 | (8.57)   | 15      | (14.02)  | 13    | (9.15)   | -               | -        | 4       | (14.29)  | 14           | (22.22)  | 8                  | (5.03)   | 10    | (19.61)  | 1     | (2.70)   | -   | -        | 17  | (17.89)  |
|                     | <i>Necomys sp.</i>           | 1                  | (0.48)   | 1       | (0.93)   | 1     | (0.70)   | -               | -        | -       | -        | 1            | (1.59)   | 1                  | (0.63)   | -     | -        | -     | -        | -   | -        | 1   | (1.05)   |
|                     | <i>Nectomys squamipes</i>    | 1                  | (0.48)   | 1       | (0.93)   | 1     | (0.70)   | -               | -        | -       | -        | 1            | (1.59)   | 1                  | (0.63)   | -     | -        | -     | -        | -   | -        | 1   | (1.05)   |
|                     | <i>Oligoryzomys nigripes</i> | 8                  | (3.81)   | 8       | (7.48)   | 8     | (5.63)   | 4               | (3.36)   | 1       | (3.57)   | 3            | (4.76)   | 6                  | (3.77)   | 2     | (3.92)   | 2     | (5.41)   | 1   | (1.28)   | 5   | (5.26)   |
|                     | <i>Oligoryzomys sp.</i>      | 11                 | (5.24)   | 11      | (10.28)  | 8     | (5.63)   | 2               | (1.68)   | 3       | (10.71)  | 6            | (9.52)   | 9                  | (5.66)   | 2     | (3.92)   | 8     | (21.62)  | -   | -        | 3   | (3.16)   |
|                     | <i>Rattus rattus</i>         | 3                  | (1.43)   | 3       | (2.80)   | 3     | (2.11)   | -               | -        | -       | -        | 3            | (4.76)   | 3                  | (1.89)   | -     | -        | 2     | (5.41)   | -   | -        | 1   | (1.05)   |
|                     | <i>Rhipidomys sp.</i>        | 2                  | (0.95)   | 2       | (1.87)   | 2     | (1.41)   | 2               | (1.68)   | -       | -        | -            | -        | 2                  | (1.26)   | -     | -        | 1     | (2.70)   | -   | -        | 1   | (1.05)   |
|                     | <i>Trinomys cf setosus</i>   | 2                  | (0.95)   | 2       | (1.87)   | 2     | (1.41)   | 2               | (1.68)   | -       | -        | -            | -        | 1                  | (0.63)   | 1     | (1.96)   | 1     | (2.70)   | -   | -        | 1   | (1.05)   |
| Total of rodents    |                              | 67                 | (31.90)  | 61      | (57.01)  | 54    | (38.03)  | 12              | (10.08)  | 14      | (50.00)  | 41           | (65.08)  | 42                 | (26.42)  | 25    | (49.02)  | 20    | (54.05)  | 2   | (2.56)   | 45  | (47.37)  |
| Total of samples    |                              | 210                | (100.00) | 107     | (100.00) | 142   | (100.00) | 119             | (100.00) | 28      | (100.00) | 63           | (100.00) | 159                | (100.00) | 51    | (100.00) | 37    | (100.00) | 78  | (100.00) | 95  | (100.00) |
